# Supplementary material for: Diet-microbiome interactions promote enteric nervous system resilience following spinal cord injury
Source: PubMed Central journal article supplement — bioRxiv. 2024 Jun 8:2024.06.06.597793. Preprint. [Version 1] doi: 10.1101/2024.06.06.597793 (PMC11185755; doi:10.1101/2024.06.06.597793), 2024-06-08

## Supplementary Figure S1. Cohort-dependent impacts on SCI-triggered dysbiosis

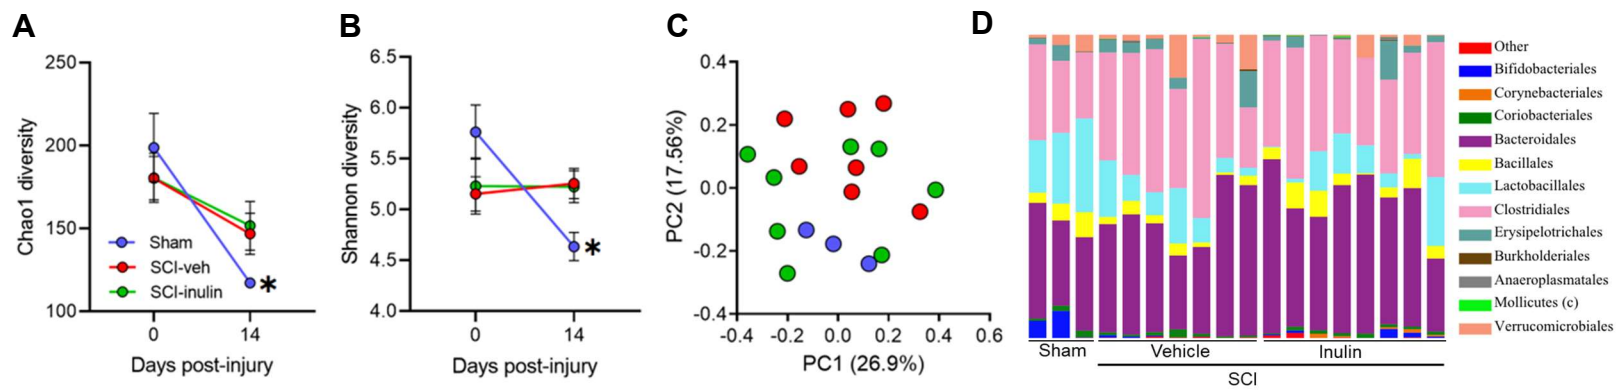

## Supplementary Figure S2. Injury and diet-associated microbes are not sufficient to trigger NBD

**A**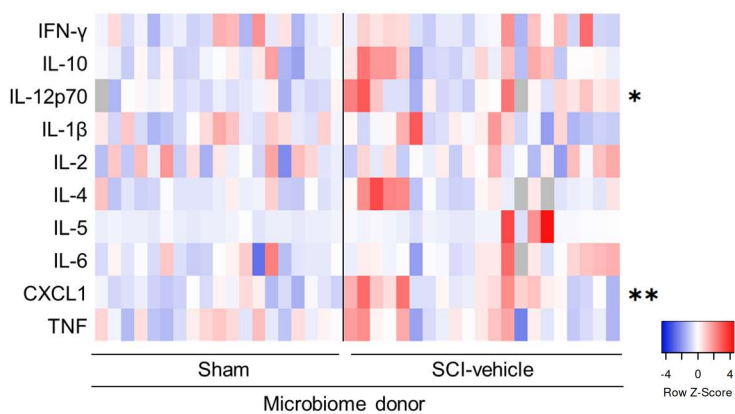**B**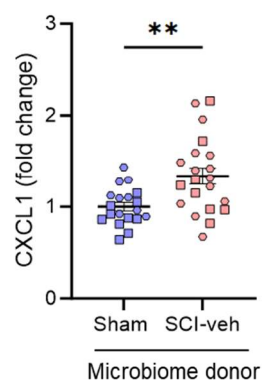**C**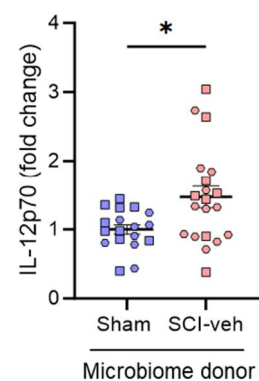**D**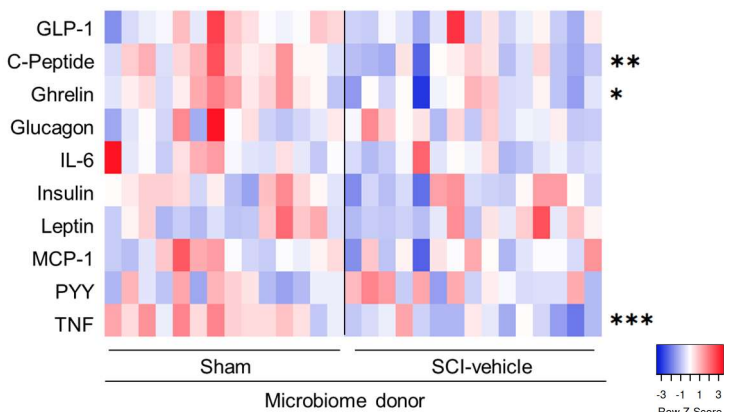**E**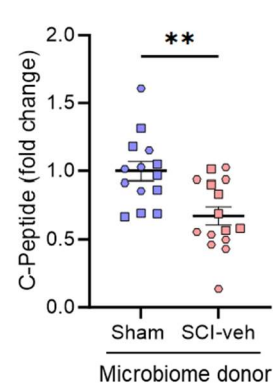**F**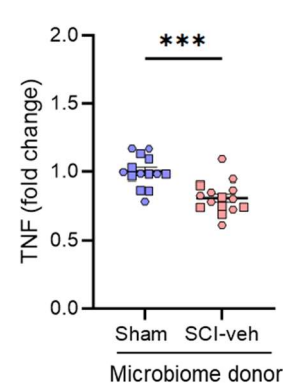**G**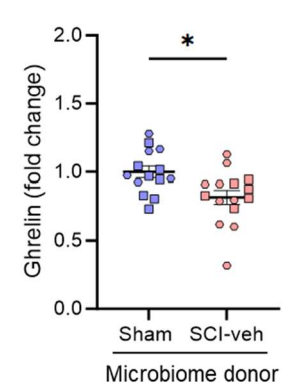**H**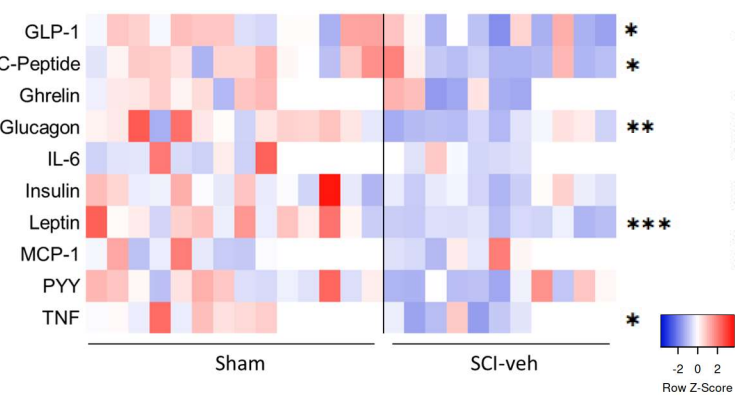**I**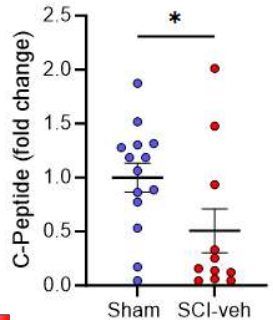**J**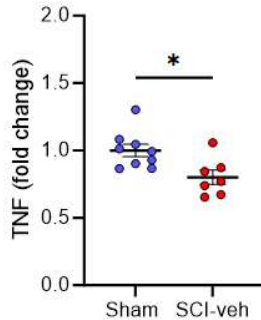**K**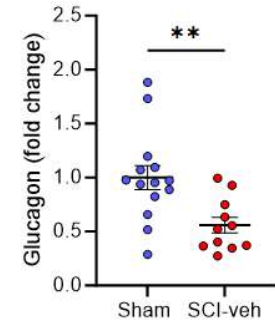**L**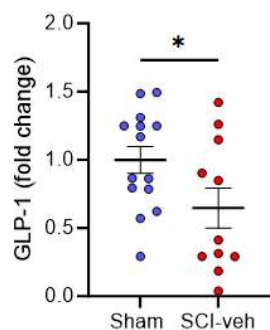**M**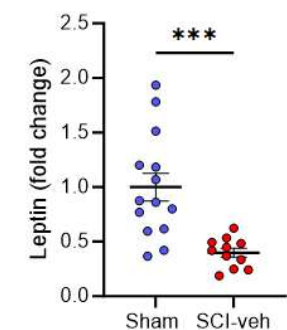

## Supplementary Figure S3. SCFA-induced IL-10 signaling is necessary for SCI recovery

**A**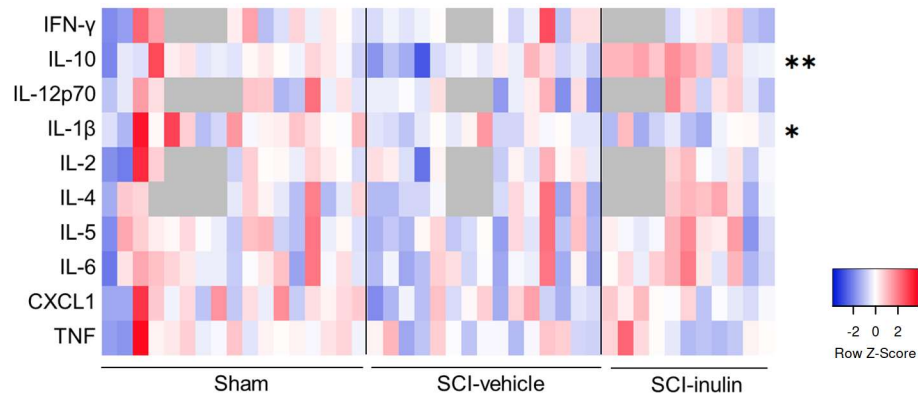**B**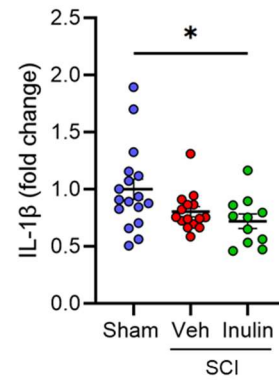**C**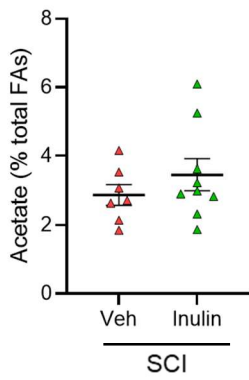**D**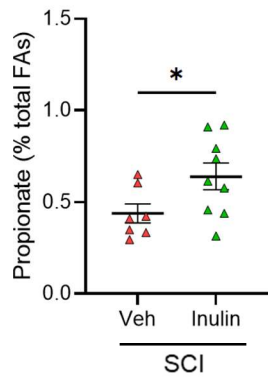**E**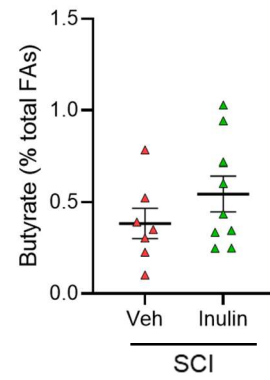**F**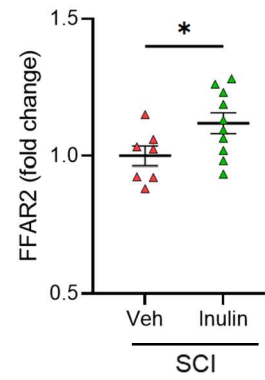**G**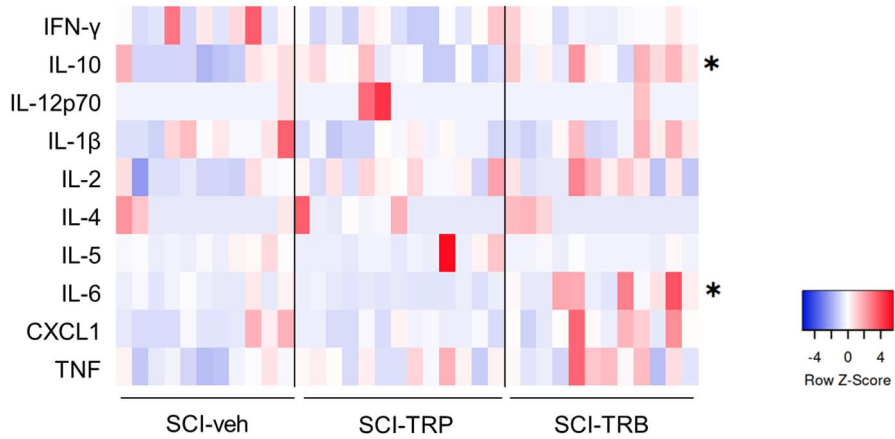**H**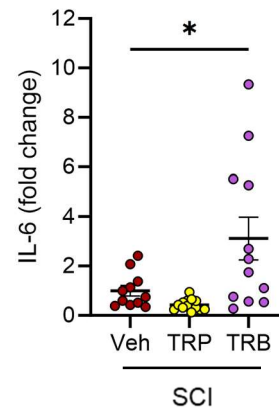**I**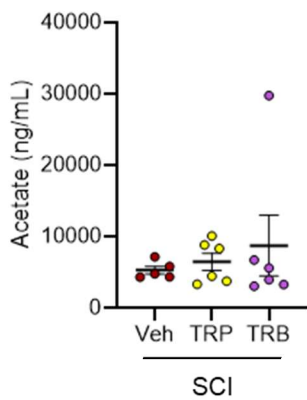**J**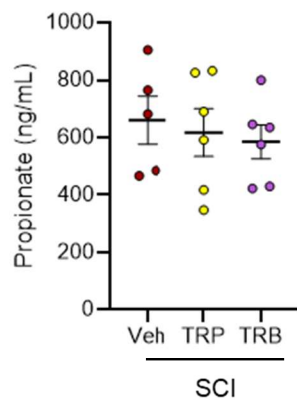**K**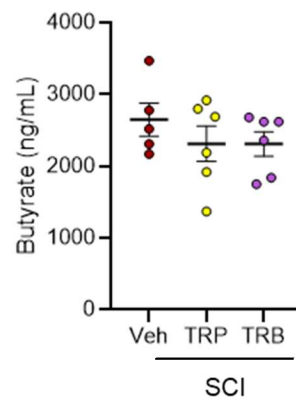

Supplement: media-1.pdf [file media-1.pdf]
